# Supplementary material for: On the nature and role of mathematical intuition
Source: Royal Society of Chemistry journal article supplement (doi:10.1039/c9na00633h), 1994-01-01
Supplement: c9na00633h1.pdf [file c9na00633h1.pdf]

## Supporting Information

### **Three dimensional Ni<sub>3</sub>S<sub>2</sub> nanorod arrays as multifunctional electrodes for electrochemical energy storage and conversion applications**

Kexin Cui<sup>a</sup>, Jincheng Fan<sup>a,\*</sup>, Songyang Li<sup>a</sup>, Moukaila Fatiya Khadidja<sup>a</sup>, Jianghong Wu<sup>a,b</sup>, Mingyu Wang<sup>a</sup>, Jianxin Lai<sup>a</sup>, Hongguang Jin<sup>a</sup>, Wenbin Luo<sup>a</sup>, Zisheng Chao<sup>a,\*</sup>

<sup>a</sup>*College of Materials Science and Engineering, Changsha University of Science and Technology, Changsha, Hunan 410114, China*

<sup>b</sup>*College of Health Science and Environmental Engineering, Shenzhen Technology University, Shenzhen, Guangdong 518118, China*

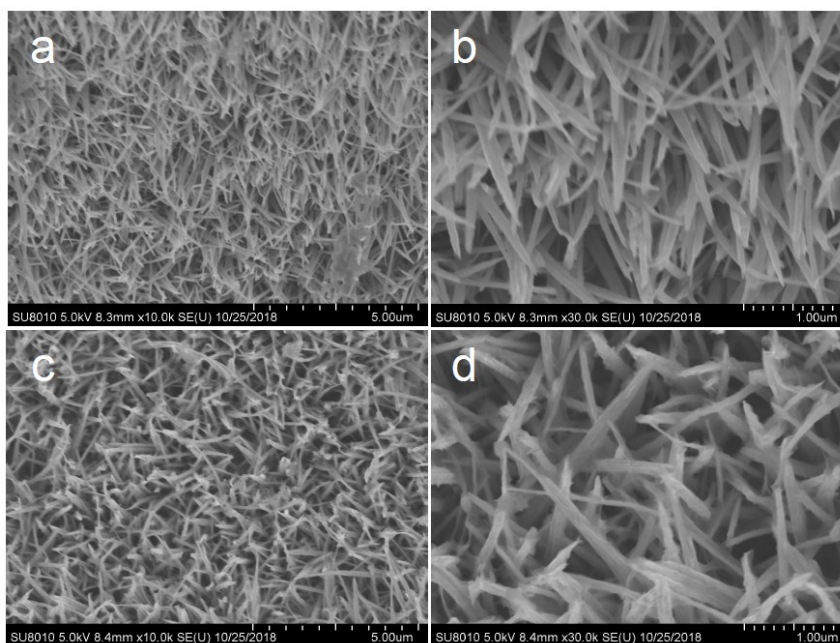

**Figure S1.** SEM images of the  $\text{Ni}_3\text{S}_2$  nanorods on Ni foam with different magnifications for S-100-16 (a and b) and S-140-16 (c and d), (a) and (c)  $\times 10\text{k}$ ; (b) and (d)  $\times 30\text{k}$ .

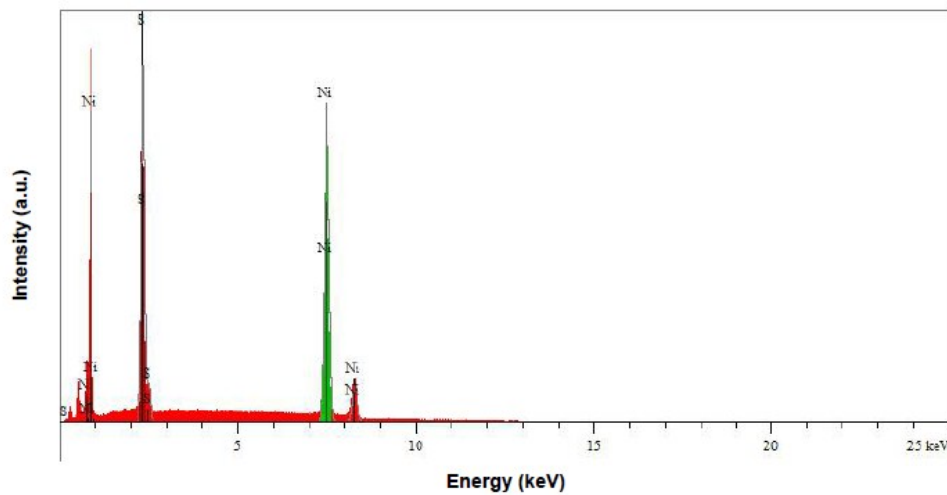

**Figure S2.** EDS elemental analysis of  $\text{Ni}_3\text{S}_2$  nanorods on Ni foam. Only Ni and S peaks were observed, indicating the purity of the synthesized  $\text{Ni}_3\text{S}_2$  nanorods.

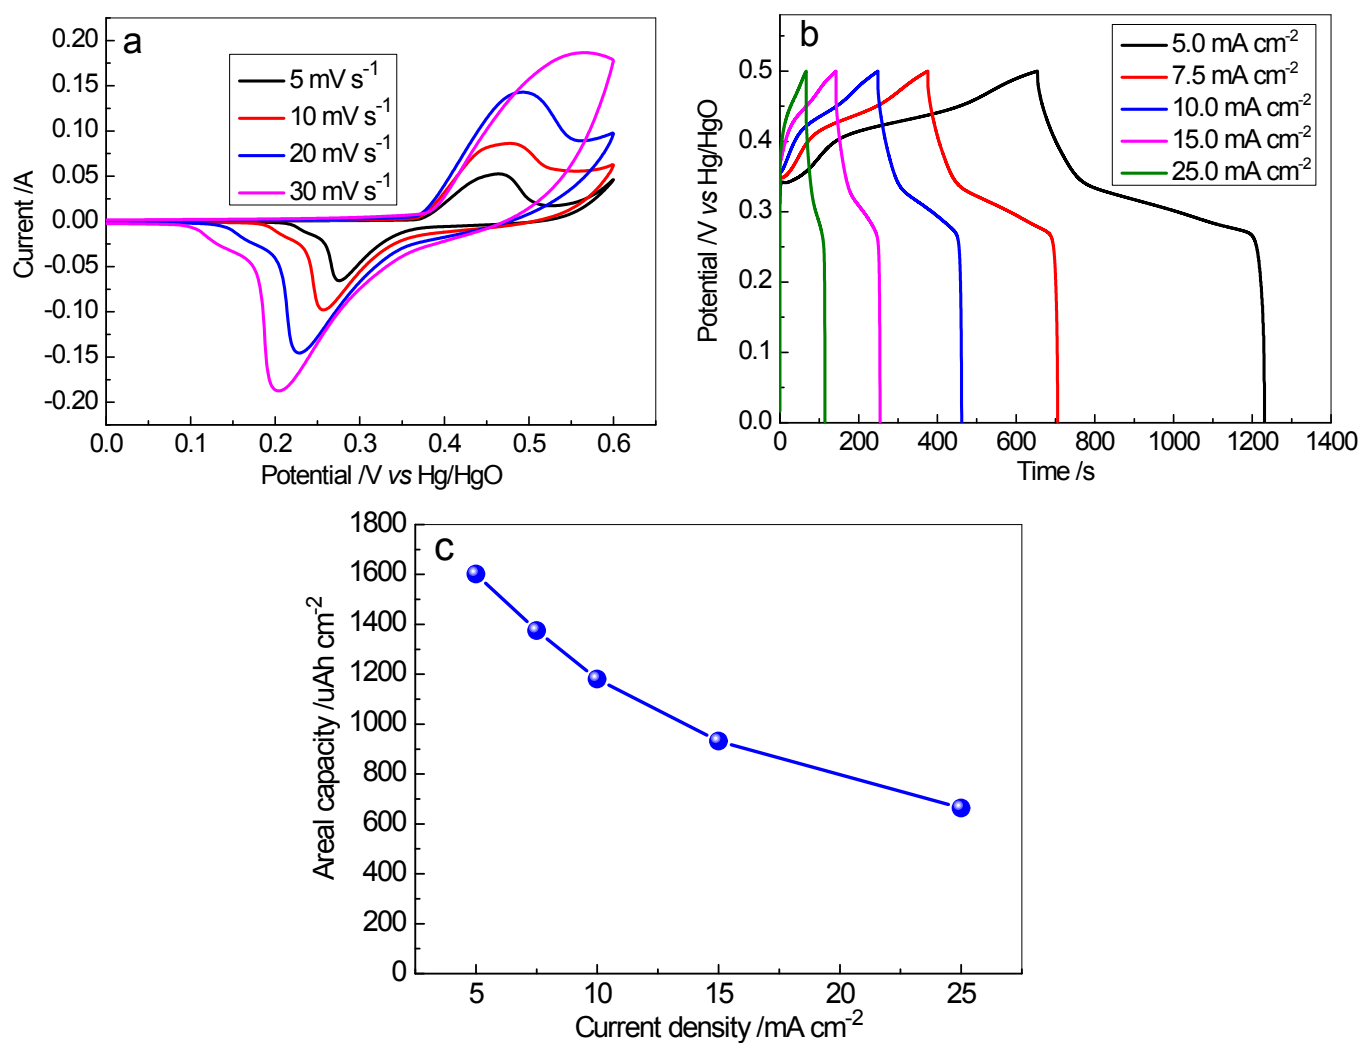

**Figure S3.** (a) CV curves obtained for S-120-16 electrode at different scan rates; (b) GCD profiles obtained for S-120-16 electrode at different current density; (c) The areal capacitance calculated from the discharge process at different current density.

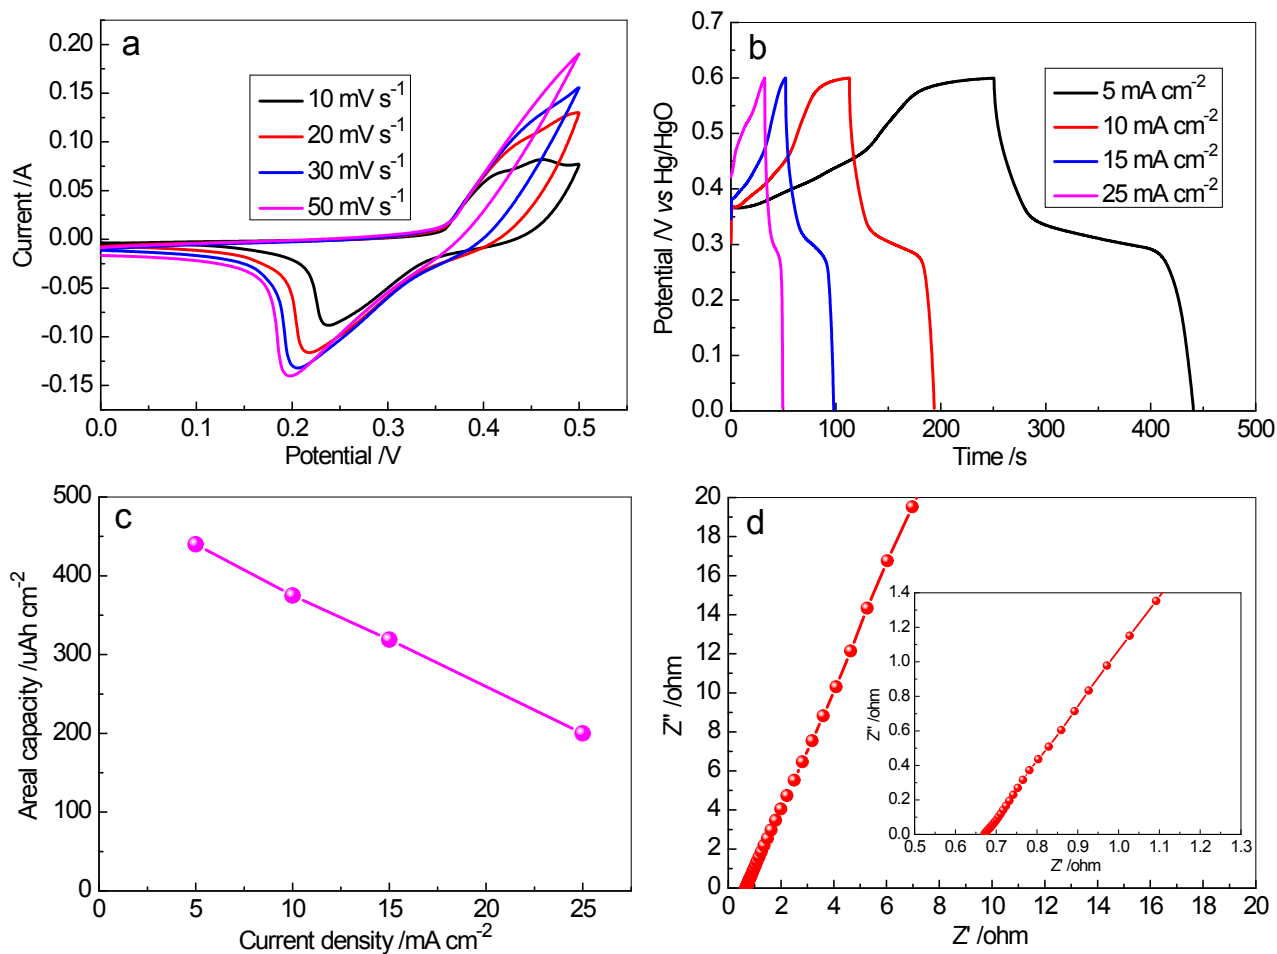

**Figure S4.** (a) CV curves obtained for S-140-16 electrode at different scan rates; (b) GCD profiles obtained for S-140-16 electrode at different current density; (c) The areal capacitance calculated from the discharge process at different current density; (d) Nyquist plots of S-140-16.

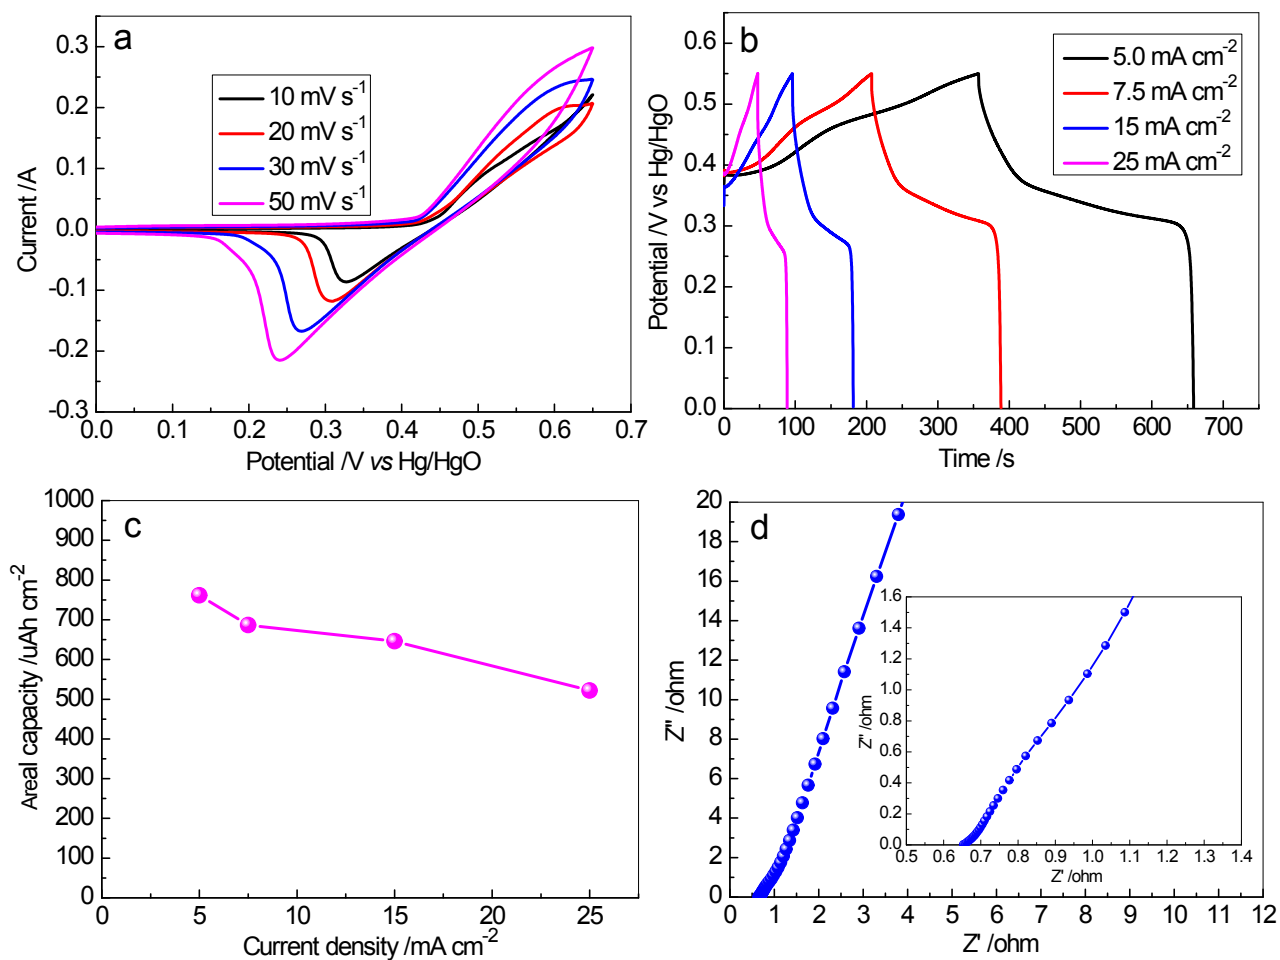

**Figure S5.** (a) CV curves obtained for S-100-16 electrode at different scan rates; (b) GCD profiles obtained for S-100-16 electrode at different current density; (c) The areal capacitance calculated from the discharge process at different current density; (d) Nyquist plots of S-100-16.

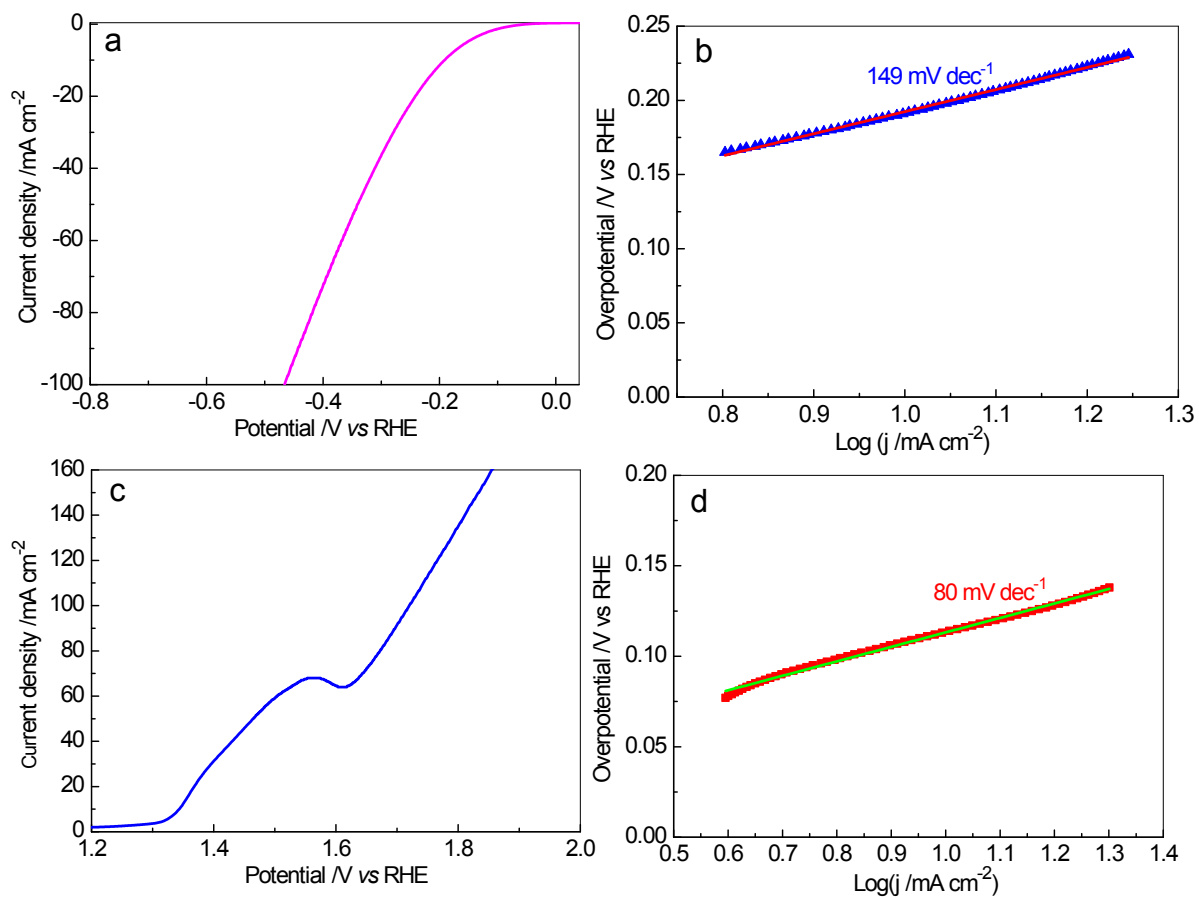

**Figure S6.** LSV curves recorded in 1.0 M KOH at a scan rate of 5 mV s<sup>-1</sup> on S-140-16, (a) LSV curve for HER, (b) The corresponding Tafel plots for HER; (c) LSV curve for OER, (d) The corresponding Tafel plots for OER.

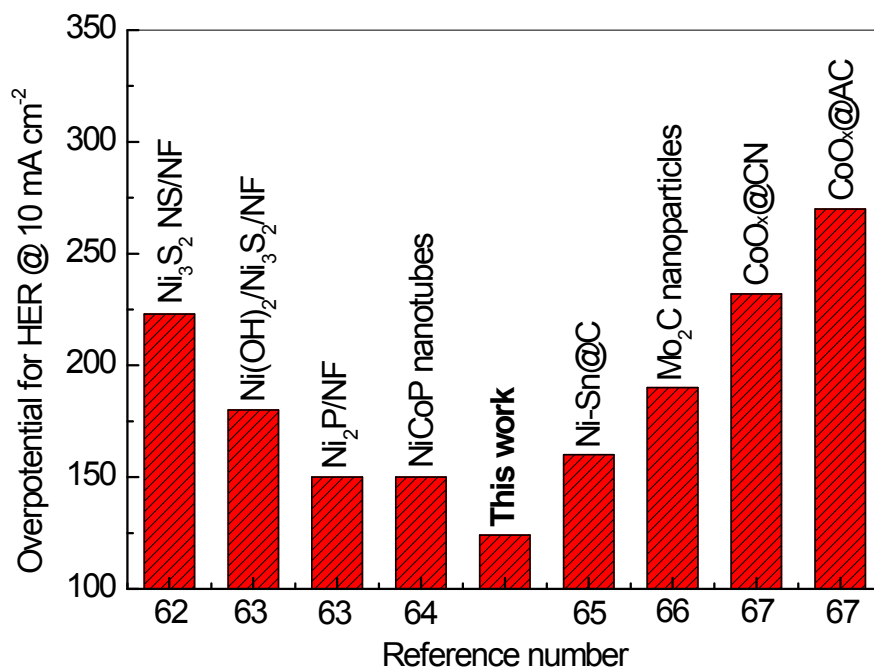

**Figure S7.** Comparison of overpotential values to achieve 10 mA cm<sup>-2</sup> between Ni<sub>3</sub>S<sub>2</sub> nanorod arrays (S-120-16) and the other recently reported HER catalysts, Numbers are references cited. The overpotential of Ni<sub>3</sub>S<sub>2</sub> nanorod arrays was much lower than those of the other reported HER catalysts.



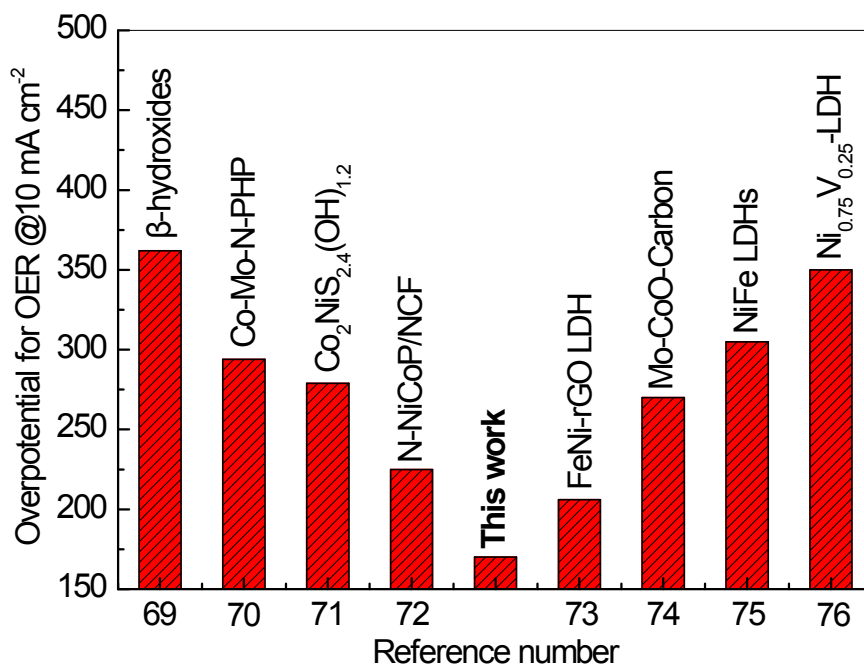

**Figure S8.** Comparison of overpotential values to achieve 10 mA cm<sup>-2</sup> between Ni<sub>3</sub>S<sub>2</sub> nanorod arrays (S-120-16) and the other recently reported OER catalysts , Numbers are references cited. The of overpotential Ni<sub>3</sub>S<sub>2</sub> nanorod arrays was much lower than those of the other reported OER catalysts.
